# Supplementary material for: Construction of 2D nanoporous networks by coupling on-surface dynamic imine chemistry and dipole-stabilized self-assembly
Source: Royal Society of Chemistry journal article supplement (doi:10.1039/c6cc08482f), 2016-11-29
Supplement: c6cc08482f1.pdf [file c6cc08482f1.pdf]

Electronic Supplementary Information

**Construction of 2D nanoporous network by coupling on-surface  
dynamic imine chemistry and dipole-stabilized self-assembly**

Jie-Yu Yue,<sup>a,b</sup> Marios Markoulides,<sup>c</sup> Andrew C. Regan,<sup>d</sup> Shu-Ying Li,<sup>a,b</sup> Nikos  
Chronakis,<sup>e</sup> André Gourdon,<sup>c</sup> Ting Chen,<sup>a</sup> Hui-Juan Yan,<sup>a</sup> and Dong Wang<sup>\*a,b</sup>

<sup>a</sup> *Institute of Chemistry, Chinese Academy of Sciences (CAS), Beijing 100190, P. R.  
China.*

*E-mail: wangd@iccas.ac.cn; Fax: +86 (0) 10 82616935*

<sup>b</sup> *University of CAS, Beijing 100049 (P. R. China).*

<sup>c</sup> *CEMES-CNRS, UP8011, BP 94347, Nanosciences Group, 29 rue Jeanne Marvig,  
31055, Toulouse, France.*

<sup>d</sup> *School of Chemistry, The University of Manchester, Manchester, M13 9PL, UK.*

<sup>e</sup> *Department of Chemistry, University of Cyprus, 2109, Aglantzia, Nicosia, Cyprus.*

## Materials and methods

A Nanoscope IIIa SPM (Digital Instruments, Santa Barbara, CA) was employed for STM experiments. STM tips were made by mechanically cutting a Pt/Ir wire (90:10). All the STM images were collected in constant-current mode at ambient conditions at room temperature and were displayed without further processing.

Molecule A and [1'', 1': 4', 1'':4'', 1''] triphenyl-4, 4'''-dicarbaldehyde (molecule B), were synthesized by the reported literature.<sup>1, 2</sup> The <sup>1</sup>H NMR and <sup>13</sup>C NMR spectra were in accordance with the reported literature. [1, 1'-biphenyl]-4, 4'-dicarboxaldehyde (molecule C), 4'-formyl-biphenyl-4-carboxylic acid ethyl ester (molecule E) and 4-biphenylcarboxaldehyde (molecule F) were purchased from J&K. [1, 1'-biphenyl]-4-carbaldehyde (molecule D) was purchased from TCI. THF was served as the solvent and was purchased from TCI. All the chemicals used in this study, unless otherwise specified, were utilized without further purification.

## The typical synthesis procedure

4  $\mu$ L THF solution containing molecule A with the concentration about  $10^{-5}$  mol/L and molecule B/C with concentration about  $10^{-5}$  mol/L were deposited on freshly cleaved HOPG surface, respectively. Then the treated HOPG was shifted to an autoclave with several  $\text{CuSO}_4 \cdot 5\text{H}_2\text{O}$  powder (about 1 g) at the bottom. The autoclave was then sealed and placed into a heating oven at 150/120  $^{\circ}\text{C}$  for 3h. After cooling down, the

HOPG was taken out for STM characterization.

### **The control experiments**

Molecule A and molecule D/E/F were served as precursors. 4  $\mu\text{L}$  THF solution containing molecule A with concentration about  $10^{-5}$  mol/L and molecule D/E/F with concentration about  $10^{-5}$  mol/L were deposited on freshly cleaved HOPG surface, respectively. Then the treated HOPG and several  $\text{CuSO}_4 \cdot 5\text{H}_2\text{O}$  powder were shifted to an autoclave. The autoclave was closed and heated at 120  $^{\circ}\text{C}$  for 3h. After the reaction, the HOPG was cooled down to room temperature and taken out for STM characterization.

### **Supplementary figures**

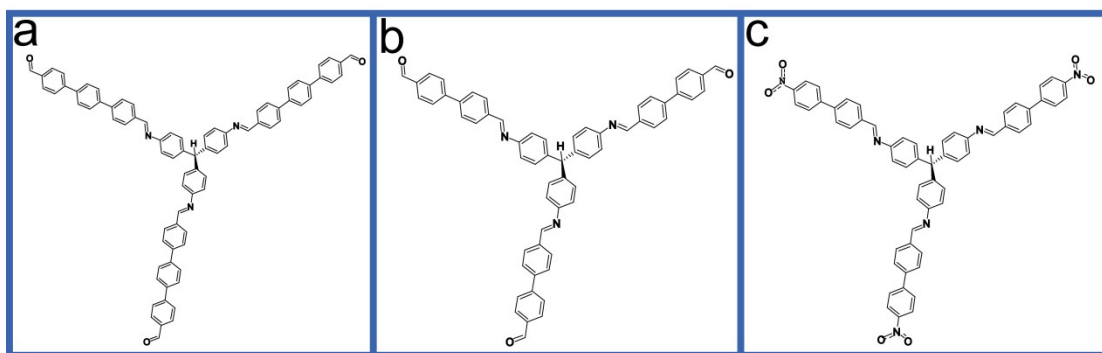

Fig. S1 (a) Chemical structure of imine oligomer AB<sub>3</sub>. (b) Chemical structure of imine oligomer AC<sub>3</sub>. (c) Chemical structure of imine oligomer AD<sub>3</sub>.

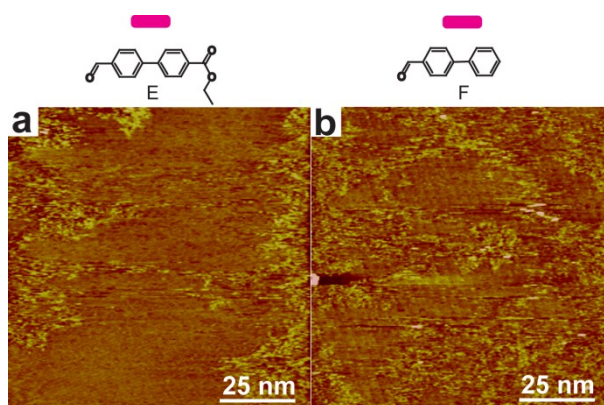

Fig. S2. Chemical structure of molecule E and F and STM image of the reaction results. (a) The reaction between molecule A and E. (b) The reaction between molecule A and F. Imaging conditions: (a)  $V_{\text{bias}} = 700 \text{ mV}$ ,  $I_t = 500 \text{ pA}$ ; (b)  $V_{\text{bias}} = 700 \text{ mV}$ ,  $I_t = 550 \text{ pA}$ .

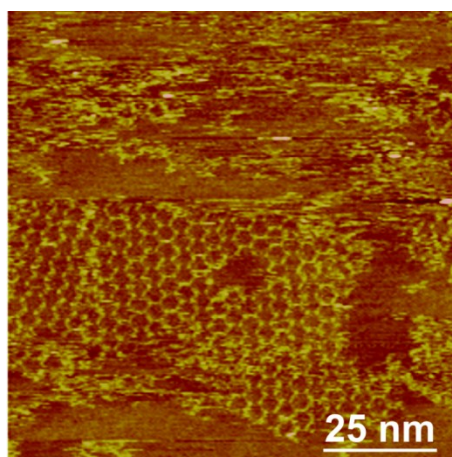

Fig. S3 STM image of the reaction between molecule A and B at 200 °C. Imaging conditions:  $V_{\text{bias}} = 700 \text{ mV}$ ,  $I_t = 500 \text{ pA}$ .

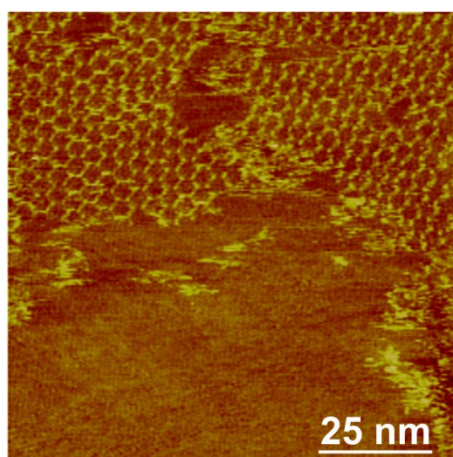

Fig. S4 STM image of the reaction between molecule A and B at 150 °C with the concentration of molecule A at  $5 \times 10^{-6}$  M and the concentration of molecule B at  $10^{-6}$  M. Imaging conditions:  $V_{\text{bias}} = 700$  mV,  $I_t = 500$  pA.

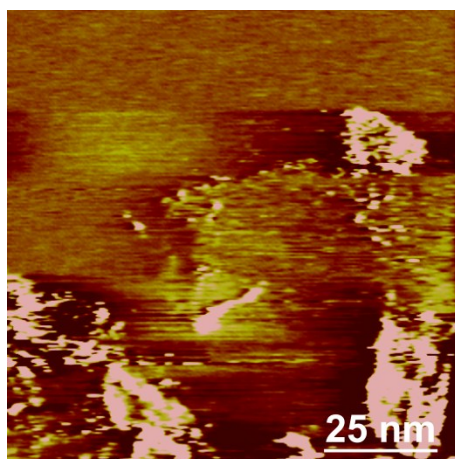

Fig. S5 STM image of the reaction between molecule A and B at 150 °C with the concentration of molecule A and B at  $10^{-3}$  M. Imaging conditions:  $V_{\text{bias}} = 700$  mV,  $I_t = 500$  pA.

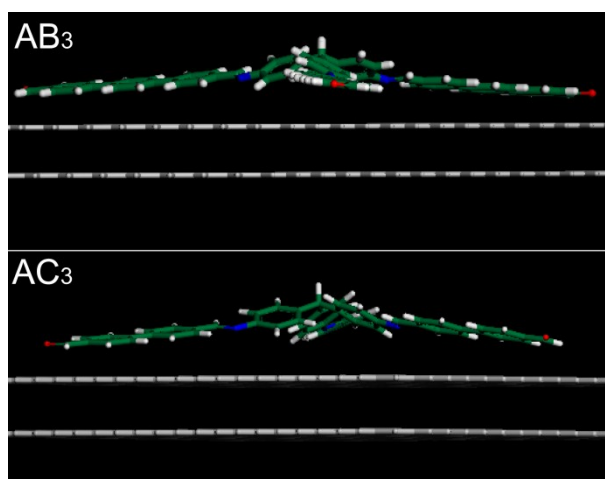

Fig. S6 The side view of imine oligomers AB<sub>3</sub> and AC<sub>3</sub> on the HOPG.

## References

- 1 N. Chronakis, M. Markoulides, C. Efthymiou and A. Tasiopoulos, *Synlett*, 2015, **26**, 2659-2662.
- 2 M. Kozáková, M. Buděšínský and J. Hodačová, *Synth. Commun.*, 2005, **35**, 161-167.
- 3 L. Ascherl, T. Sick, J. T. Margraf, S. H. Lapidus, M. Calik, C. Hettstedt, K. Karaghiosoff, M. Döblinger, T. Clark, K. W. Chapman, F. Auras and T. Bein, *Nat. Chem.*, 2016, **8**, 310-316.
